# Supplementary material for: Small RNAs OmrA and OmrB promote class III flagellar gene expression by inhibiting the synthesis of anti-Sigma factor FlgM
Source: PubMed Central journal article supplement (PMC7549644; doi:10.1080/15476286.2020.1733801), 2020-03-05
Supplement: KRNB_A_1733801_SM6017.pdf [file KRNB_A_1733801_SM6017.pdf]

**Small RNAs OmrA and OmrB promote class III flagellar gene expression by  
inhibiting the synthesis of anti-Sigma factor FlgM**

Cédric Romilly, Mirthe Hoekzema<sup>(a)</sup>, Erik Holmqvist\*, and E. Gerhart. H. Wagner\*

Department of Cell and Molecular Biology, Biomedical Center, Uppsala university,  
Box 596, Husargatan 3, S-75124 Uppsala, Sweden

(a) Current address: Department of Molecular Microbiology, Groningen Biomolecular  
Sciences and Biotechnology Institute, University of Groningen,  
Nijenborg 7, 9747 AG Groningen, The Netherlands.

\*Corresponding authors: erik.holmqvist@icm.uu.se, gerhart.wagner@icm.uu.se

**Supplemental material**

**Figure S1.** OmrA and B base-pair with the *flgM* mRNA near the ribosome binding site.

**Figure S2.** Absolute GFP/OD600 values of the experiments presented in the main paper.

**Figure S3.** Duplex prediction between the *flhD*, *flgM* or *flgM\_M1* mRNAs with OmrA, OmrA\_M1, or OmrA\_M2

**Table S1.** Primers used in this study

**Table S2.** Strains used in this study

**Table S3.** Plasmids used in this study

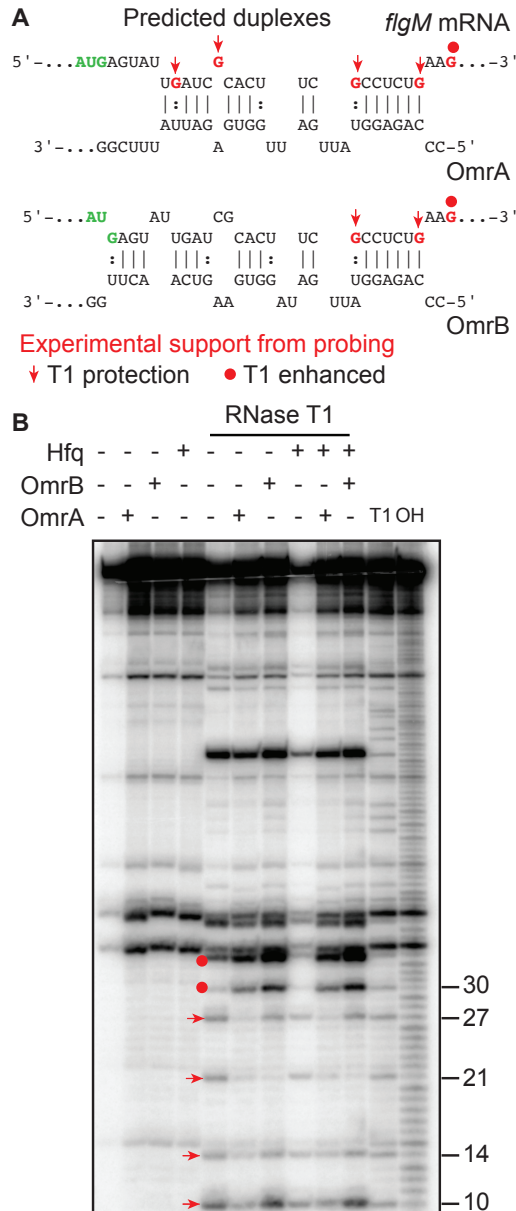

**Figure S1.** OmrA and B base-pair to *flgM* mRNA near the ribosome binding site.

**A.** Prediction of duplex formation between the *flgM* mRNA and OmrA or OmrB. The AUG start codon indicated is in green. G residues that show changes in cleavage intensity in the experiment displayed in B are highlighted in red; red dots - enhanced T1 cuts, red arrows - protection from T1 cleavage.

**B.** Footprinting experiment defining the OmrA/OmrB binding site on labeled *flgM* mRNA, in the absence or presence of Hfq. Protection against RNase T1 cleavage: red arrows; enhanced T1 cuts: red circles. Nucleotide positions, relative to the AUG start codon, are indicated next to the autoradiogram and are based on the T1 ladder (T1) and hydroxyl radical ladder (OH).

Data related to Figure 2B

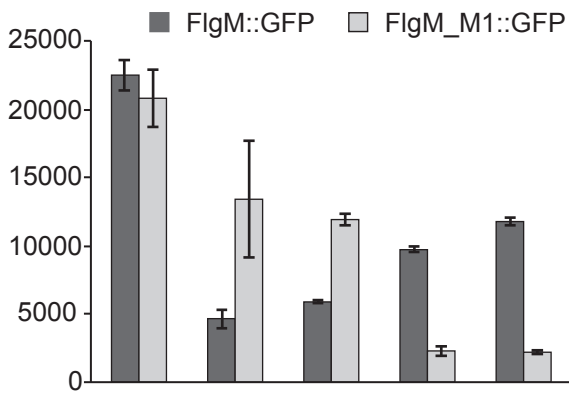

Data related to Figure 2C

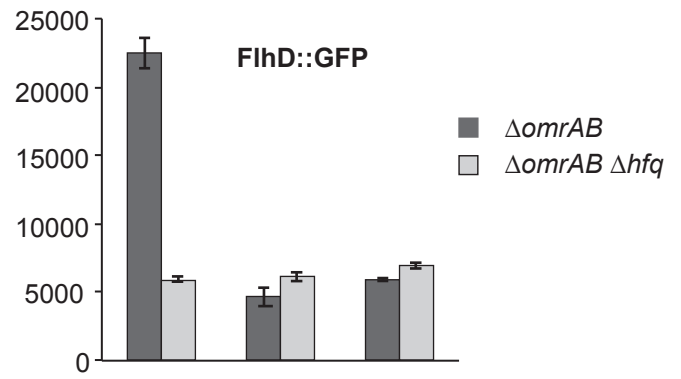

Data related to Figure 4B

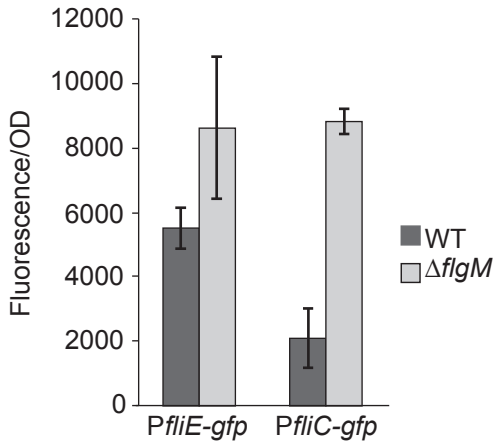

Data related to Figure 5 A

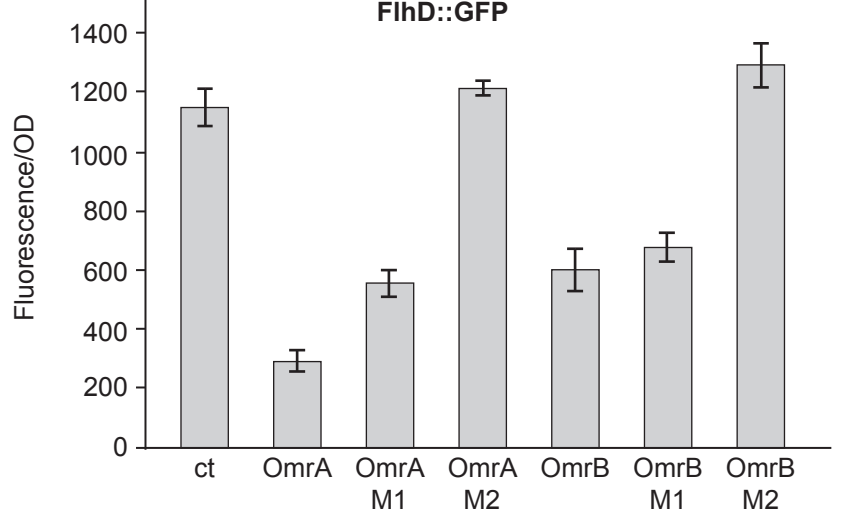

Data related to Figure 5 A

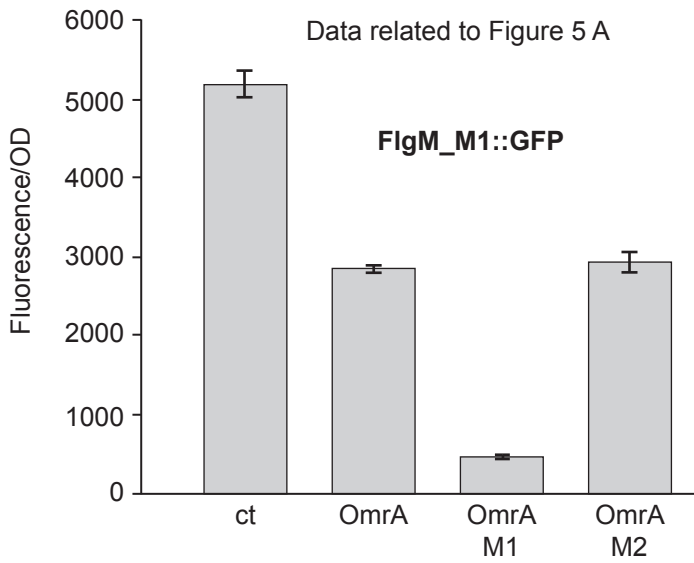

Data related to Figure 5 A

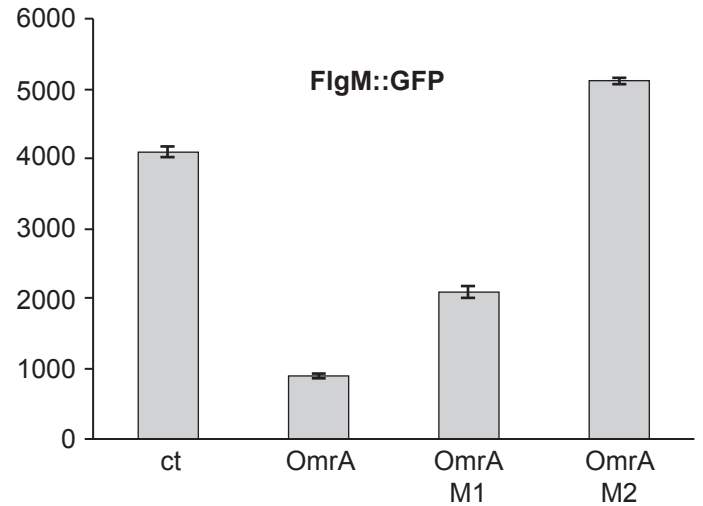

Data related to Figure 6 A

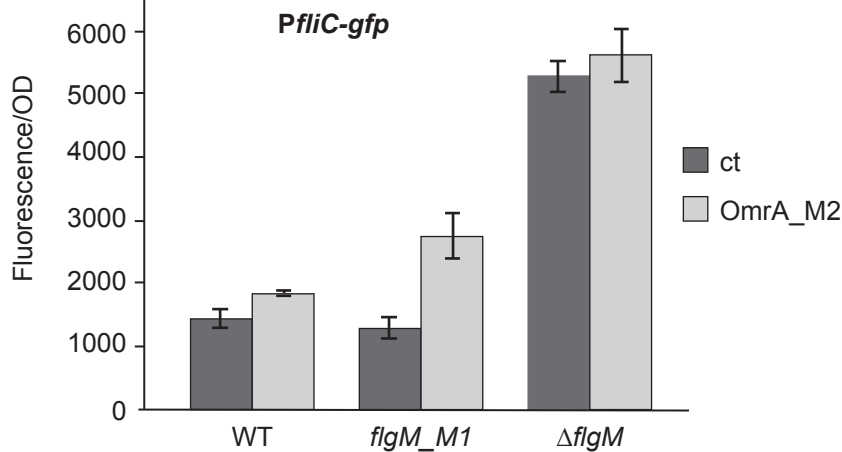

*flhD* mRNA

```
5'-. . .ACAUC      U A      C      AAAUAA      UA      UGGGA. . .-3'
      ACGGGGUGCGG GA      ACCG AUAA      AGUUGGU UUCUGGG
      |:|:|:|:|:|:| |:| |:|:|:|:|:|:|:|:|:|:|:|:|:|:|:|:|:|
      UGUCCCAUGCU CU      UGGC UAUU      UUAGUUA GAGACCC
3'-. . .UUCUC      U CGCA      U      AGAGUGG      UG      -5'
```

OmrA

*flhD* mRNA

```
5'-. . .ACAUC      U A      C      AAAUAA      UA      UGGGA. . .-3'
      ACGGGGUGCGG GA      ACCG AUAA      AGUUGGU UUCUGGG
      |:|:|:|:|:|:| |:| |:|:|:|:|:|:|:|:|:|:|:|:|:|:|:|:|:|
      UGUCCCAUGCU CU      UGGC UAUU      UUAGUUA GAGACCC
3'-. . .UUCUC      U CGCA      U      AGAGUGG      UG      -5'
```

OmrA\_M1

*flhD* mRNA

```
5'-. . .ACAUC      U A      C      AAAUAA      UA      UGGGA. . .-3'
      ACGGGGUGCGG GA      ACCG AUAA      AGUUGGU UUCUGGG
      |:|:~|:~|:~|:~|:~ |:| |:|:~|:~|:~|:~|:~|:~|:~|:~|:~|:~|:~|
      UGUCCCAUGCU CU      UGGC UAUU      UUAGUUA GAGACCC
3'-. . .UUCUC      U CGCA      U      AGAGUGG      UG      -5'
```

OmrA\_M2

*flgM* mRNA

```
5'-. . .AUGAGUAU      G      AAG. . .-3'
      UGAUC CACU      UC      GCCUCUG
      |:|:|:|:|:|:| |:| |:|:|:|:|:|:|:|:|:|:|:|:|:|:|:|:|:|
      AUUAG GUGG      AG      UGGAGAC
3'-. . .GGCUUU      A      UU      UUA      CC-5'
```

OmrA

*flgM\_M1* mRNA

```
5'-. . .AUGAGUAU      G      AAG. . .-3'
      UGAUC CACU      UC      GCCUCUC
      |:|:|:|:|:|:| |:| |:|:|:|:|:|:|:|:|:|:|:|:|:|:|:|:|:|
      AUUAG GUGG      AG      UGGAGA
3'-. . .GGCUUU      A      UU      UUA      CC-5'
```

OmrA\_M1

*flgM\_M1* mRNA

```
5'-. . .AUGAGUAU      G      AAG. . .-3'
      UGAUC CACU      UC      GCCUCUC
      |:|:|:|:|:|:~|:~|:~|:~|:~ |:| |:|:~|:~|:~|:~|:~|:~|:~|:~|:~|:~|:~|
      AUUAG GUGG      AG      UGGAGG
3'-. . .GGCUUU      A      UU      UUA      CC-5'
```

OmrA\_M2

**Figure S3.** Duplex prediction between the *flhD*, *flgM* or *flgM\_M1* mRNAs with OmrA, OmrA\_M1 or OmrA\_M2

**Table S1.** Primers used in this study

| Primer name | Sequence (5' to 3') <sup>a,b</sup>                                                                           | Template                          | Remarks                                                                                        |
|-------------|--------------------------------------------------------------------------------------------------------------|-----------------------------------|------------------------------------------------------------------------------------------------|
| ced287      | GGAATAAACCATGAGTATTGATCGCACTTCGCTCTGAAGTGTAGGCTGGAGCTGCTTC                                                   | ced58                             | PCR product for <i>kan-sacB</i> cassette insertion into the chromosome in the <i>flgM</i> gene |
| ced288      | GCGCGTCAGTGGTTTCGCGCGTTGAACGGTGCTTACAGGACATATGAATATCCTCC<br>TTAGTTCC                                         | ced58                             | PCR product for <i>kan-sacB</i> cassette insertion into the chromosome in the <i>flgM</i> gene |
| ced289      | CCCTCAATGAGGAATAAACCATGAGTATTGATCGCACTTCGCAAGACTTGCAGAGTAA<br>CTGATCGTATGACACGTCTTGACAG                      | ced78                             | PCR product for in frame deletion of <i>flgM</i>                                               |
| ced290      | CTGCAAGACGTGTACATACGATCAGTTACTCTGCAAGTCTTGCGAAGTGCGATCAATAC<br>TCATGGTTTATTCTCATTGAGGG                       | ced78                             | PCR product for in frame deletion of <i>flgM</i>                                               |
| ced373      | AACACATGATAAAAGCGCCCTCAATGAG                                                                                 | pflgM_M1::gfp                     | PCR product for point mutation in <i>flgM</i>                                                  |
| ced374      | GCGTCAGTGGTTTCGCGCGG                                                                                         | pflgM_M1::gfp                     | PCR product for point mutation in <i>flgM</i>                                                  |
| ced291      | AACCTATCCAGTTAACCCA                                                                                          | BW25113 / MC4100                  | Amplification of the <i>flgM</i> gene                                                          |
| ced292      | AACTGTTGAGGTAATCCA                                                                                           | BW25113 / MC4100                  | Amplification of the <i>flgM</i> gene                                                          |
| EHO-671     | GTTTTTATGCA7AACACATGATAAAAGCGCCCTCAATGAG                                                                     | BW25113 / MC4100                  | PCR for flgM::GFP plasmid creation                                                             |
| EHO-433     | GTTTTTGCTAGCGTCAGTGGTTTCGCGCGG                                                                               | BW25113 / MC4100                  | PCR for flgM::GFP plasmid creation                                                             |
| EHO-696     | CGCACTTCGCTCTCAAGCCTGTAAGCAC                                                                                 | pflgM::gfp                        | PCR for flgM_M1::GFP plasmid creation                                                          |
| EHO-697     | GTGCTTACAGGCTTGAGAGGGCAAGTGCCG                                                                               | pflgM::gfp                        | PCR for flgM_M1::GFP plasmid creation                                                          |
| EHO-698     | CAAGATACTGAGCACCCGAGAGGTATTGATTGGTG                                                                          | pOmrA                             | PCR for pOmrA_M1 plasmid creation                                                              |
| EHO-699     | CACCAATCAATACCTCTCGGGTGCTCAGTATCTTG                                                                          | pOmrA                             | PCR for pOmrA_M1 plasmid creation                                                              |
| EHO-700     | CAAGATACTGAGCACCCGAGAGGTATTGATAGGTG                                                                          | pOmrB                             | PCR for pOmrB_M1 plasmid creation                                                              |
| EHO-701     | CACCTATCAATACCTCTCGGGTGCTCAGTATCTTG                                                                          | pOmrB                             | PCR for pOmrB_M1 plasmid creation                                                              |
| EHO-363     | CTGAGCACCGGAGAGGTATTGATTGGTGAGATTATT                                                                         | pOmrA                             | PCR for pOmrA_M2 plasmid creation                                                              |
| EHO-364     | AATAATCTCACCAATCAATACCTCTCCGGTGCTCAG                                                                         | pOmrA                             | PCR for pOmrA_M2 plasmid creation                                                              |
| EHO-367     | CTGAGCACCGGAGAGGTATTGATAGGTGAAGTCAAC                                                                         | pOmrB                             | PCR for pOmrB_M2 plasmid creation                                                              |
| EHO-368     | GTTGACTTCACCTATCAATACCTCTCCGGTGCTCAG                                                                         | pOmrB                             | PCR for pOmrB_M2 plasmid creation                                                              |
| EHO-348     | GAAATTAATACGACTCACTATAGGGAGATGGGCTGATGAGTCCGTGAGGACGAAACG<br>GTACCCGGTACCGTCCCCAGAGGTATTGATTGG               | EHO-349                           | For T7-Hammerhead-OmrA, anneal to EHO-349, fill-in                                             |
| EHO-349     | AAAAAAAAACCTGCGCATCCGCGCAGGTTGGTGCAAGAGACAGGGTACGAAGAGCGTA<br>CCGAATAATCTCACCAATCAATACCTCTGGGGA              | EHO-348                           | For T7-Hammerhead-OmrA, anneal to EHO-348, fill-in                                             |
| EHO-350     | GAAATTAATACGACTCACTATAGGGAGATGGGCTGATGAGTCCGTGAGGACGAAACG<br>GTACCCGGTACCGTCCCCAGAGGTATTGATAG                | EHO-351                           | For T7-Hammerhead-OmrB, anneal to EHO-351, fill-in                                             |
| EHO351      | AAAAAAAAACCTGCGCATCTGCGCAGGCTGGTGTAAATTCATGTGCTCAACCCGAAGTTG<br>ACTTCACCTATCAATACCTCTGGGGACGG                | EHO-350                           | For T7-Hammerhead-OmrB, anneal to EHO-350, fill-in                                             |
| MHO-200     | GCCGGGTTGCATCAGTTTTG                                                                                         | <i>flgM</i> mRNA / MC4100         | Toeprint oligo and <i>flgM</i> mRNA transcription                                              |
| EHO-714     | GAAATTAATACGACTCACTATAGGGAACACATGATAA AAGCGCCCTCAA                                                           | MC4100                            | With MHO 200, <i>flgM</i> mRNA transcription                                                   |
| MHO-207     | GGTAATACGACTCACTATAGGCCAGGGGTGCTCGGCATAA                                                                     | E397                              | <i>ompA 3xflag</i> mRNA transcription                                                          |
| MHO-230     | ACGAAAGTCAGTTCAATTTACTAAAGGC                                                                                 | E397                              | <i>ompA 3xflag</i> mRNA transcription                                                          |
| MHO-238     | GTTTTTCTCGAGCCCTATAGTGAGTCGTATTAATTTCCG                                                                      | pET52b (Novagen)                  | Linearization of pET52b, removal His tag, addition of 3xFLAG and XhoI/AatII sites              |
| MHO-239     | GTTTTTGACGTCGACTACAAAGACCATGACGGTGATTATAAAGATCATGATATCGACTA<br>CAAAGATGACGACGATAAATAGTAAATTAACCTAGGCTGCTGCCA | pET52b (Novagen)                  | Linearization of pET52b, removal His tag, addition of 3xFLAG and XhoI/AatII sites              |
| MHO-240     | GTTTTTCTCGAGAACACATGATAAAAGCGCCCTCAA                                                                         | MC4100                            | PCR of 5'UTR + <i>flgM</i> CDS minus stop codon, and addition of XhoI/AatII sites              |
| MHO-241     | GTTTTTGACGTCGTTACTCTGCAAGTCTTGCTGCG                                                                          | MC4100                            | PCR of 5'UTR + <i>flgM</i> CDS minus stop codon, and addition of XhoI/AatII sites              |
| MHO-244     | TACCCACGCCGAAACAAG                                                                                           | pET52b – T7 – <i>flgM</i> -3xflag | <i>flgM 3xflag</i> mRNA transcription                                                          |
| MHO-245     | AGCAAAAACCCCTCAAGAC                                                                                          | pET52b – T7 – <i>flgM</i> -3xflag | <i>flgM 3xflag</i> mRNA transcription                                                          |

(a) **TAATACGACTCACTATAG**: T7 promoter sequence

(b) *NNNNNN* Restriction site

**Table S2.** Strains used in this study

| Strain name | Relevant genotype                                                                     | Plasmid 1              | Plasmid 2        | Reference                       | Remarks                                                                                                                 |
|-------------|---------------------------------------------------------------------------------------|------------------------|------------------|---------------------------------|-------------------------------------------------------------------------------------------------------------------------|
|             | MC4100 <i>relA</i> + $\Delta$ <i>omrAB</i>                                            | -                      | -                | (Holmqvist et al., 2010)        |                                                                                                                         |
|             | BW25113                                                                               | -                      | -                | <i>E. coli</i> stock collection |                                                                                                                         |
| ced58       | MG1655 <i>rpsA</i> :: <i>kan-SacB</i>                                                 | -                      | -                | (Romilly et al., 2019)          | Template to obtain the <i>kan-sacB</i> cassette                                                                         |
| MH268       | BW25113 $\Delta$ <i>omrAB</i> :: <i>FRT-tet-FRT</i>                                   | -                      | -                | This study                      |                                                                                                                         |
| ced74       | MC4100 <i>relA</i> + $\Delta$ <i>omrAB</i>                                            | pSim5                  | -                | This study                      | Scarless mutagenesis                                                                                                    |
| ced78       | MC4100 <i>relA</i> + $\Delta$ <i>omrAB flgM</i> :: <i>kan-sacB</i>                    | pSim5                  | -                | This study                      | Scarless mutagenesis, <i>kan-sacB</i> cassette insertion, with PCR product obtained with <i>ced287/ced288</i> primers   |
| ced75       | BW25113                                                                               | pSim5                  | -                | This study                      | Scarless mutagenesis                                                                                                    |
| ced79       | BW25113 <i>flgM</i> :: <i>kan-sacB</i>                                                | pSim5                  | -                | This study                      | Scarless mutagenesis, <i>kan-sacB</i> cassette insertion, with PCR product obtained with <i>ced287/ced288</i> primers   |
| ced81       | MC4100 <i>relA</i> + $\Delta$ <i>flgM</i> $\Delta$ <i>omrAB</i>                       | -                      | -                | This study                      | In-frame deletion, scarless mutagenesis from <i>ced78</i> , with PCR product obtained with <i>ced289/ced290</i> primers |
| ced84       | BW25113 $\Delta$ <i>flgM</i>                                                          | -                      | -                | This study                      | In-frame deletion, scarless mutagenesis from <i>ced79</i> , with PCR product obtained with <i>ced289/ced290</i> primers |
| ced118      | BW25113 $\Delta$ <i>flgM</i> $\Delta$ <i>omrAB</i> :: <i>FRT-tet-FRT</i>              | -                      | -                | This study                      | P1 transduction, MH268 donor, <i>ced84</i> recipient                                                                    |
| ced158      | BW25113 <i>flgM_M1</i>                                                                | -                      | -                | This study                      | Point mutation, scarless mutagenesis from <i>ced79</i> , with PCR product obtained with <i>ced373/ced374</i> primers    |
| ced159      | BW25113 <i>flgM_M1</i> $\Delta$ <i>omrAB</i> :: <i>FRT-tet-FRT</i>                    | -                      | -                | This study                      | P1 transduction, MH268 donor, <i>ced158</i> recipient                                                                   |
| E922        | MC4100 <i>relA</i> + $\Delta$ <i>omrAB</i>                                            | p <i>flgM</i> ::GFP    | pControl         | This study                      | Used for data in Fig.2, <i>flgM</i> translational fusion                                                                |
| E923        | MC4100 <i>relA</i> + $\Delta$ <i>omrAB</i>                                            | p <i>flgM</i> ::GFP    | p <i>OmrA</i>    | This study                      | Used for data in Fig.2, <i>flgM</i> translational fusion                                                                |
| E924        | MC4100 <i>relA</i> + $\Delta$ <i>omrAB</i>                                            | p <i>flgM</i> ::GFP    | p <i>OmrB</i>    | This study                      | Used for data in Fig.2, <i>flgM</i> translational fusion                                                                |
| E968        | MC4100 <i>relA</i> + $\Delta$ <i>omrAB</i>                                            | p <i>flgM</i> ::GFP    | p <i>OmrA_M1</i> | This study                      | Used for data in Fig.2, <i>flgM</i> translational fusion                                                                |
| E969        | MC4100 <i>relA</i> + $\Delta$ <i>omrAB</i>                                            | p <i>flgM</i> ::GFP    | p <i>OmrB_M1</i> | This study                      | Used for data in Fig.2, <i>flgM</i> translational fusion                                                                |
| E965        | MC4100 <i>relA</i> + $\Delta$ <i>omrAB</i>                                            | p <i>flgM_M1</i> ::GFP | pControl         | This study                      | Used for data in Fig.2, <i>flgM_M1</i> translational fusion                                                             |
| E966        | MC4100 <i>relA</i> + $\Delta$ <i>omrAB</i>                                            | p <i>flgM_M1</i> ::GFP | p <i>OmrA</i>    | This study                      | Used for data in Fig.2, <i>flgM_M1</i> translational fusion                                                             |
| E967        | MC4100 <i>relA</i> + $\Delta$ <i>omrAB</i>                                            | p <i>flgM_M1</i> ::GFP | p <i>OmrB</i>    | This study                      | Used for data in Fig.2, <i>flgM_M1</i> translational fusion                                                             |
| E970        | MC4100 <i>relA</i> + $\Delta$ <i>omrAB</i>                                            | p <i>flgM_M1</i> ::GFP | p <i>OmrA_M1</i> | This study                      | Used for data in Fig.2, <i>flgM_M1</i> translational fusion                                                             |
| E971        | MC4100 <i>relA</i> + $\Delta$ <i>omrAB</i>                                            | p <i>flgM_M1</i> ::GFP | p <i>OmrB_M1</i> | This study                      | Used for data in Fig.2, <i>flgM_M1</i> translational fusion                                                             |
| E1009       | MC4100 <i>relA</i> + $\Delta$ <i>omrAB</i> $\Delta$ <i>hfq</i> ( <i>FRT-tet-FRT</i> ) | p <i>flgM</i> ::GFP    | pControl         | This study                      | Used for data in Fig.2, <i>flgM</i> translational fusion                                                                |
| E1010       | MC4100 <i>relA</i> + $\Delta$ <i>omrAB</i> $\Delta$ <i>hfq</i> ( <i>FRT-tet-FRT</i> ) | p <i>flgM</i> ::GFP    | p <i>OmrA</i>    | This study                      | Used for data in Fig.2, <i>flgM</i> translational fusion                                                                |
| E1011       | MC4100 <i>relA</i> + $\Delta$ <i>omrAB</i> $\Delta$ <i>hfq</i> ( <i>FRT-tet-FRT</i> ) | p <i>flgM</i> ::GFP    | p <i>OmrB</i>    | This study                      | Used for data in Fig.2, <i>flgM</i> translational fusion                                                                |
| ced129      | BW25113 $\Delta$ <i>omrAB</i> :: <i>FRT-tet-FRT</i>                                   | p <i>flhC</i>          | -                | This study                      | Used for data in Fig.4, <i>flhC</i> transcriptional fusion                                                              |
| ced130      | BW25113 $\Delta$ <i>omrAB</i> :: <i>FRT-tet-FRT</i>                                   | p <i>flhE</i>          | -                | This study                      | Used for data in Fig.4, <i>flhE</i> transcriptional fusion                                                              |
| ced131      | BW25113 $\Delta$ <i>flgM</i> $\Delta$ <i>omrAB</i> :: <i>FRT-tet-FRT</i>              | p <i>flhC</i>          | -                | This study                      | Used for data in Fig.4, <i>flhC</i> transcriptional fusion                                                              |
| ced132      | BW25113 $\Delta$ <i>flgM</i> $\Delta$ <i>omrAB</i> :: <i>FRT-tet-FRT</i>              | p <i>flhE</i>          | -                | This study                      | Used for data in Fig.4, <i>flhE</i> transcriptional fusion                                                              |
| ced120      | MC4100 <i>relA</i> + $\Delta$ <i>flgM</i> $\Delta$ <i>omrAB</i>                       | p <i>flhD</i> ::GFP    | pControl         | This study                      | Used for data in Fig.5, <i>flhD</i> ::GFP translational fusion                                                          |
| ced121      | MC4100 <i>relA</i> + $\Delta$ <i>flgM</i> $\Delta$ <i>omrAB</i>                       | p <i>flhD</i> ::GFP    | p <i>OmrA</i>    | This study                      | Used for data in Fig.5, <i>flhD</i> ::GFP translational fusion                                                          |
| ced122      | MC4100 <i>relA</i> + $\Delta$ <i>flgM</i> $\Delta$ <i>omrAB</i>                       | p <i>flhD</i> ::GFP    | p <i>OmrB</i>    | This study                      | Used for data in Fig.5, <i>flhD</i> ::GFP translational fusion                                                          |
| ced123      | MC4100 <i>relA</i> + $\Delta$ <i>flgM</i> $\Delta$ <i>omrAB</i>                       | p <i>flhD</i> ::GFP    | p <i>OmrA_M1</i> | This study                      | Used for data in Fig.5, <i>flhD</i> ::GFP translational fusion                                                          |
| ced124      | MC4100 <i>relA</i> + $\Delta$ <i>flgM</i> $\Delta$ <i>omrAB</i>                       | p <i>flhD</i> ::GFP    | p <i>OmrB_M1</i> | This study                      | Used for data in Fig.5, <i>flhD</i> ::GFP translational fusion                                                          |
| ced125      | MC4100 <i>relA</i> + $\Delta$ <i>flgM</i> $\Delta$ <i>omrAB</i>                       | p <i>flhD</i> ::GFP    | p <i>OmrB_M2</i> | This study                      | Used for data in Fig.5, <i>flhD</i> ::GFP translational fusion                                                          |
| ced126      | MC4100 <i>relA</i> + $\Delta$ <i>flgM</i> $\Delta$ <i>omrAB</i>                       | p <i>flhD</i> ::GFP    | p <i>OmrA_M2</i> | This study                      | Used for data in Fig.5, <i>flhD</i> ::GFP translational fusion                                                          |

|        |                                                                          |               |          |                          |                                                             |
|--------|--------------------------------------------------------------------------|---------------|----------|--------------------------|-------------------------------------------------------------|
| ced175 | MC4100 <i>relA</i> + $\Delta$ <i>omrAB</i>                               | pflgM_M1::GFP | pControl | This study               | Used for data in Fig.5, flgM_M1::GFP translational fusion   |
| ced176 | MC4100 <i>relA</i> + $\Delta$ <i>omrAB</i>                               | pflgM_M1::GFP | pOmrA    | This study               | Used for data in Fig.5, flgM_M1::GFP translational fusion   |
| ced177 | MC4100 <i>relA</i> + $\Delta$ <i>omrAB</i>                               | pflgM_M1::GFP | pOmrA_M1 | This study               | Used for data in Fig.5, flgM_M1::GFP translational fusion   |
| ced178 | MC4100 <i>relA</i> + $\Delta$ <i>omrAB</i>                               | pflgM_M1::GFP | pOmrA_M2 | This study               | Used for data in Fig.5, flgM_M1::GFP translational fusion   |
| ced169 | BW25113 $\Delta$ <i>omrAB</i> :: <i>FRT-tet-FRT</i>                      | pfl <i>iC</i> | pControl | This study               | Used for data in Fig. 6, <i>fliC</i> transcriptional fusion |
| ced170 | BW25113 $\Delta$ <i>omrAB</i> :: <i>FRT-tet-FRT</i>                      | pfl <i>iC</i> | pOmrA_M2 | This study               | Used for data in Fig. 6, <i>fliC</i> transcriptional fusion |
| ced171 | BW25113 <i>flgM_M1</i> $\Delta$ <i>omrAB</i> :: <i>FRT-tet-FRT</i>       | pfl <i>iC</i> | pControl | This study               | Used for data in Fig. 6, <i>fliC</i> transcriptional fusion |
| ced172 | BW25113 <i>flgM_M1</i> $\Delta$ <i>omrAB</i> :: <i>FRT-tet-FRT</i>       | pfl <i>iC</i> | pOmrA_M2 | This study               | Used for data in Fig. 6, <i>fliC</i> transcriptional fusion |
| ced173 | BW25113 $\Delta$ <i>flgM</i> $\Delta$ <i>omrAB</i> :: <i>FRT-tet-FRT</i> | pfl <i>iC</i> | pControl | This study               | Used for data in Fig. 6, <i>fliC</i> transcriptional fusion |
| ced174 | BW25113 $\Delta$ <i>flgM</i> $\Delta$ <i>omrAB</i> :: <i>FRT-tet-FRT</i> | pfl <i>iC</i> | pOmrA_M2 | This study               | Used for data in Fig. 6, <i>fliC</i> transcriptional fusion |
| E397   | MC4100 <i>relA</i> + <i>ompA</i> 3xFLAG                                  | -             | -        | (Holmqvist et al., 2010) | Used for <i>ompA</i> mRNA T7 transcription                  |
| ced189 | MC4100 <i>relA</i> + $\Delta$ <i>omrAB</i>                               | pflgM_M1::GFP | pControl | This study               | Used for data in Fig.5, flgM::GFP translational fusion      |
| ced190 | MC4100 <i>relA</i> + $\Delta$ <i>omrAB</i>                               | pflgM_M1::GFP | pOmrA    | This study               | Used for data in Fig.5, flgM::GFP translational fusion      |
| ced191 | MC4100 <i>relA</i> + $\Delta$ <i>OMRab</i>                               | pflgM_M1::GFP | pOmrA_M1 | This study               | Used for data in Fig.5, flgM::GFP translational fusion      |
| ced192 | MC4100 <i>relA</i> + $\Delta$ <i>omrAB</i>                               | pflgM_M1::GFP | pOmrA_M2 | This study               | Used for data in Fig.5, flgM::GFP translational fusion      |

Holmqvist, E., Reimegård, J., Sterk, M., Grantcharova, N., Römling, U., and Wagner, E.G.H. (2010). Two antisense RNAs target the transcriptional regulator CsgD to inhibit curli synthesis. *EMBO J.* 29, 1840–1850.

Romilly, C., Deindl, S., and Wagner, E.G.H. (2019). The ribosomal protein S1-dependent standby site in *tisB* mRNA consists of a single-stranded region and a 5' structure element. *Proc. Natl. Acad. Sci. USA*, 116, 15901-15906.

**Table S3.** Plasmids used in this study

| Plasmid name  | Stock name | Reference                | Remarks                            |
|---------------|------------|--------------------------|------------------------------------|
| pflgM::GFP    | pEH159     | This study               | Translational fusion               |
| pflgM_M1::GFP | pEH173     | This study               | Translational fusion               |
| pControl      | pJV300     | (Sittka et al., 2007)    | Empty control plasmid              |
| pOmrA         | pEH67      | (Holmqvist et al., 2010) | Constitutive expression of OmrA    |
| pOmrB         | pEH68      | (Holmqvist et al., 2010) | Constitutive expression of OmrB    |
| pOmrA_M1      | pEH171     | This study               | Constitutive expression of OmrA_M1 |
| pOmrB_M1      | pEH172     | This study               | Constitutive expression of OmrB_M1 |
| pOmrA_M2      | pEH80      | This study               | Constitutive expression of OmrA_M2 |
| pOmrB_M2      | pEH83      | This study               | Constitutive expression of OmrB_M2 |
| pflhD::GFP    | pEH260     | This study               | Translational fusion               |
| pfliC         | pSC21-fliC | (Kalir et al., 2001)     | Transcriptional fusion             |
| pFliE         | pSC21-fliE | (Kalir et al., 2001)     | Transcriptional fusion             |
| pflgM 3xFLAG  | pMH26      | This study               | Template for PCR                   |

Holmqvist, E., Reimegård, J., Sterk, M., Grantcharova, N., Römling, U., and Wagner, E.G.H. (2010). Two antisense RNAs target the transcriptional regulator CsgD to inhibit curli synthesis. *EMBO J.* 29, 1840–1850.

Kalir, S., McClure, J., Pabbaraju, K., Southward, C., Ronen, M., Leibler, S., Surette, M.G., and Alon, U. (2001). Ordering Genes in a Flagella Pathway by Analysis of Expression Kinetics from Living Bacteria. *Science* 292, 2080–2083.

Sittka, A., Pfeiffer, V., Tedin, K., and Vogel, J. (2007). The RNA chaperone Hfq is essential for the virulence of *Salmonella typhimurium*. *Mol. Microbiol.* 63, 193–217.
